# Supplementary material for: Optimizing Glycemic Control Through Titration of Insulin Glargine 100 U/mL: A Review of Current and Future Approaches with a Focus on Asian Populations
Source: Springer Nature journal article supplement (doi:10.1007/s13300-017-0322-z), 2017-11-01
Supplement: MOESM1 [file 15183152]

**Table S1. Overview of key Gla-100 TTT clinical trials involving patients with T2DM with inadequate glycemic control on OADs alone.**

| Study | Intervention | Efficacy and safety endpoints | Titration algorithm for Gla-100 | Outcomes |
| --- | --- | --- | --- | --- |
| Fritsche A, *et al*. 2003 [1] | Patients were randomized for 24 weeks to:   - Morning Gla-100 plus glimepiride - Bedtime NPH insulin plus glimepiride - Bedtime Gla-100 plus glimepiride | **Efficacy:**   - Change in HbA1c level from baseline to endpoint   **Safety:**   - Frequency of patients experiencing hypoglycemic episodes | **Starting dose:** According to the formula of Holman and Turner [2]  **Titration:** Conducted at every physician visit, based on whether patient’s FBG was greater than the below values for at least 1‒2 consecutive days prior to the physician visit  **Target:** FBG ≤5.56 mmol/L  **Algorithm:**  **FBG >5.6 mmol/L:** dose increased by 2 units  **FBG >6.7 mmol/L:** dose increased by 4 units  **FBG >7.8 mmol/L:** dose increased by 6 units  **FBG >8.9 mmol/L:** dose increased by 8 units | **Efficacy:**   - HbA1c levels improved by –1.24% with morning Gla-100, –0.96% with bedtime Gla-100, and by –0.84% with bedtime NPH insulin - HbA1c improvements statistically greater with morning Gla-100 than the other treatment groups   **Safety:**   - Nocturnal hypoglycemia less frequent with morning (17%) and bedtime Gla-100 (23%) than with bedtime NPH insulin (38%)  (p <0.001) |
| The Treat-to-Target Trial  Riddle MC, *et al.* 2003 [3] | Overweight patients were randomized for 24 weeks to:   - Bedtime Gla-100 with metformin - Bedtime NPH with metformin | **Efficacy:**   - Percentage of patients achieving HbA1c ≤7.0% without symptomatic nocturnal hypoglycemia (PG ≤4 mmol/L) and/or meeting criteria for severe hypoglycemia   **Safety:**   - Overall rates of symptomatic hypoglycemia | **Starting dose:** 10 units/day  **Titration:** Conducted weekly and based on the mean of SMFPG values from the preceding 2 days  **Target:** FPG ≤5.5 mmol/L  **Algorithm:**  **FPG 5.6–6.7 mmol/L:** dose increased by 2 units  **FPG 6.7–7.8 mmol/L:** dose increased by 4 units  **FPG 7.8–10.0 mmol/L**: dose increased by 6 units  **FPG ≥10 mmol/L:** dose increased by 8 units | **Efficacy:**   - Nearly 25% more patients on Gla-100 attained HbA1c ≤7.0% without documented nocturnal hypoglycemia than with NPH (33.2% vs 26.7%; p <0.05)   **Safety:**   - Rates of other categories of symptomatic hypoglycemia were 21–48% lower with Gla-100 |
| LAPTOP  Janka HU, *et al*. 2005 [4] | Patients were randomized for 24 weeks to:   - Morning Gla-100 plus glimepiride and metformin - 70/30 premixed insulin b.i.d. without OADs | **Efficacy:**   - Change in HbA1c level from baseline to endpoint   **Safety:**   - Proportion of patients with hypoglycemic events - Frequency of hypoglycemic events | **Starting dose:** 10 units/day  **Titration:** Weekly adjustments for 8 weeks and at 2-week intervals thereafter, and based on daily SMCBG measurements using meters  **Target:** FBG ≤5.6 mmol/L  **Algorithm:**  **BG >100–120 mg/dL:** dose increased by 2 units  **BG >120–140 mg/dL:** dose increased by 4 units  **BG >140–160 mg/dL:** dose increased by 6 units  **BG >160 mg/dL:** dose increased by 8 units | **Efficacy:**   - Mean HbA1c decrease from baseline was significantly greater (–1.64% vs –1.31%;  p = 0.0003) with Gla-100 plus OADs than with 70/30 premixed insulin - More patients reached HbA1c ≤7.0% without confirmed nocturnal hypoglycemia (45.5% vs 28.6%; p = 0.0013) with Gla-100 plus OADs than with 70/30 premixed insulin   **Safety:**   - Patients on Gla-100 plus OADs had fewer confirmed hypoglycemic episodes than those on 70/30 premixed insulin (mean 4.07 vs 9.87/patient-year; p <0.0001) |
| Eliaschewitz FG, *et al.* 2006 [5] | Patients were randomized for 24 weeks to:   - Glimepiride plus bedtime Gla-100 - Glimepiride plus bedtime NPH insulin | **Efficacy:**   - Change in HbA1c levels between baseline and the end of the study   **Safety:**   - Symptomatic hypoglycemic events | **Titration:** Conducted daily and based on the highest SMFBG value of the last 2 consecutive days  **Target:** FBG ≤5.5 mmol/L  **Algorithm:**  **6.7 mmol/L ≥ FBG >5.5 mmol/L**: dose increased by 2 units  **7.8 mmol/L ≥ FBG >6.7 mmol/L**: dose increased by 4 units  **8.9 mmol/L ≥ FBG >7.8 mmol/L**: dose increased by 6 units  **FBG >8.9 mmol/L**: dose increased by 8 units | **Efficacy:**   - Similar HbA1c reductions achieved  (–1.38 ± 1.32% for Gla-100 vs –1.44 ± 1.33% for NPH insulin; p = 0.795)   **Safety:**   - Confirmed nocturnal hypoglycemia significantly lower with Gla-100 vs NPH insulin (16.9% vs 30.0%; p <0.01) |
| TRIPLE  Rosenstock J, *et al.* 2006 [6] | Patients were randomized for 24 weeks to:   - Bedtime Gla-100 with continued sulfonylurea and metformin - Rosiglitazone with continued sulfonylurea and metformin | **Efficacy:**   - Comparison of glycemic control (measured by HbA1c) between Gla-100 and rosiglitazone   **Safety:**   - AEs - Hypoglycemia - Body weight | **Starting dose:** 10 units/day  **Titration:** Done weekly and based on FPG and monitored BG meter levels for the previous 2 consecutive days along with no severe hypoglycemia or BG (<4 mmol/l)  **Target:** FPG ≤5.5–6.7 mmol/L  **Algorithm:**  **6.7 mmol/L ≥ FPG ≥5.5 mmol/L:** dose increased by 0–2 units  **7.8 mmol/L ≥ FPG ≥6.7 mmol/L:** dose increased by 2 units  **8.9 mmol/L ≥ FPG ≥7.8 mmol/L:** dose increased by 4 units  **10 mmol/L ≥ FPG ≥8.9 mmol/L:** dose increased by 6 units  **FPG ≥10 mmol/L:** dose increased by 8 units | **Efficacy:**   - Similar HbA1c improvements from baseline  (–1.7% vs –1.5% for Gla-100 vs rosiglitazone, respectively) - When baseline HbA1c was >9.5%, reduction in HbA1c with Gla-100 was greater than with rosiglitazone (p <0.05)   **Safety:**   - More patients in the Gla-100 group had confirmed nocturnal hypoglycemia of <3.9 mmol/L (p = 0.02) and <2.8 mmol/L (p <0.05) than in the rosiglitazone group - Patients on Gla-100 had fewer AEs than those on rosiglitazone (7% vs 29%;   p = 0.0001)   - Patients on Gla-100 had less weight gain than with rosiglitazone (1.6 ± 0.4 vs 3.0 ± 0.4 kg; p = 0.02) |
| LANMET  Yki-Järvinen H, *et al.* 2006 [7] | Patients were randomized for 36 weeks to:   - Bedtime Gla-100 with metformin - Bedtime NPH with metformin | **Efficacy:**   - Change in HbA1c from baseline to endpoint   **Safety:**   - Hypoglycemia | **Starting dose:** 10 units/day for patients who were using metformin alone, and 20 units/day for patients who had used both sulfonylurea and metformin (sulfonylurea was stopped as mandated by the study design)  **Titration**: Based on FPG values for three consecutive mornings  **Target:** FPG 4.0–5.5 mmol/L  **Algorithm:**  **FPG >5.5 mmol/L:** dose increased by 2 units  **FPG >10 mmol/L:** dose increased by 4 units | **Efficacy:**   - At 36 weeks, mean HbA1c was 7.14 ± 0.12% for Gla-100 and metformin, and 7.16 ± 0.14% for NPH and metformin; the difference between them was not significant   **Safety:**   - Hypoglycemia was significantly lower during the first 12 weeks in the Gla-100 and metformin group (4.1 ± 0.8 episodes/patient-year) than in the NPH and metformin group (9.0 ± 2.3 episodes/patient-year; p <0.05), but not significantly different thereafter - Glucose levels before dinner were higher in the NPH and metformin group (10.1 ± 0.3 mmol/L) than in the Gla-100 and metformin group (8.6 ± 0.3 mmol/L; p = 0.002) throughout the 36-week study |
| LEAD  Pan CY, *et al*.2007 [8] | Asian patients were randomized over 24 weeks to:   - Bedtime Gla-100 plus glimepiride - Bedtime NPH insulin plus glimepiride | **Efficacy:**   - Change in HbA1c level from baseline to endpoint   **Safety:**   - Hypoglycemic episodes | **Starting dose:** 0.15 units/kg/day  **Titration:**  Done at the discretion of the investigator, upwards by 2 units every 3 days until a target FBG of ≤6.7 mmol/L was achieved | **Efficacy:**   - In the PP population HbA1c levels decreased in the Gla-100 and NPH groups (1.10% vs 0.92%), and difference between adjusted means (0.19%) demonstrated noninferiority - In a superiority analysis, the difference between adjusted mean changes in the two groups was 0.22%, demonstrating the superiority of Gla-100 (p = 0.0319)   **Safety:**   - Number of hypoglycemic episodes was significantly lower with Gla-100 vs NPH insulin (p <0.004), particularly severe (p <0.03) and nocturnal (p <0.001) |
| APOLLO  Bretzel RG, *et al.* 2008 [9] | Patients were randomized for 44 weeks to:   - Gla-100 taken once daily at the same time every day plus previous OAD(s) - Insulin lispro administered three times per day plus previous OAD(s) | **Efficacy:**   - Change in HbA1c from baseline to endpoint - Baseline to endpoint changes in nocturnal BG - BG profiles at eight points throughout the day   **Safety:**   - The percentage of patients with nocturnal, severe, and symptomatic hypoglycemia | **Starting dose:** 10 units/day  **Titration:** Conducted daily and based on SMFBG values for 2 consecutive days with no severe hypoglycemia  **Algorithm:**  **FBG ≤5.5 mmol/L:** no titration needed  **6.7 mmol/L ≥ FBG >5.5 mmol/L:** dose increased by 2 units  **7.8 mmol/L ≥ FBG >6.7 mmol/L:** dose increased by 4 units  **8.9 mmol/L ≥ FBG >7.8 mmol/L:** dose increased by 6 units  **FBG >8.9 mmol/L:** dose increased by 8 units | **Efficacy:**   - Mean HbA1c decrease in the Gla-100 group was –1.7% and –1.9% for insulin lispro (within the predefined limit of 0.4% for noninferiority) - In the Gla-100 group, the fall in mean FBG  (–4.3 mmol/L vs –1.8 mmol/L; p <0.0001) and nocturnal BG (–3.3 mmol/L vs –2.6 mmol/L;   p = 0.0041) was better than in the insulin lispro group   - Insulin lispro better controlled postprandial BG throughout the day (p <0.0001)   **Safety:**   - Incidence of hypoglycemic events was less with Gla-100 than with lispro (5.2 vs 24.0 events/patient-year; p <0.0001) |
| TULIP  Blicklé JF, *et al.* 2009 [10] | Patients were randomized for 9 months to:   - Evening Gla-100 along with metformin and sulfonylurea - Intensifying LM along with metformin and sulfonylurea | **Efficacy:**   - Percentage of subjects achieving HbA1c <7% at the end of the study   **Safety:**   - Occurrence of symptomatic hypoglycemia - Change in weight between baseline and end of study | **Starting dose:** 0.1 units/kg/day  **Titration**: Conducted based on FBG values from the last 2 consecutive days, as well as absence of severe hypoglycemic episodes or BG levels <3.9 mmol/L  **Target:** FBG 3.9–5.5 mmol/L  **Algorithm:**  **FBG <3.9 mmol/L:** dose reduced by 2–4 units  **FBG ≥3.9 mmol/L:** no change in dose  **FBG ≥5.5 mmol/L:** dose increased by 1 unit  **FBG ≥6.7 mmol/L:** dose increased by 2 units  **FBG ≥7.8 mmol/L:** dose increased by 4 units  **FBG ≥8.8 mmol/L:** dose increased by 6 units | **Efficacy:**   - More patients reached HbA1c <7% (66% vs 38%; p <0.0001) with Gla-100 vs LM   **Safety:**   - Compared with the Gla-100 group, the LM group showed a decrease in weight (–0.9 ± 2.9 vs –2.5 ± 3.2 kg; p <0.0001), as well as lower symptomatic hypoglycemia (55.3% vs 25.0%; p <0.0001) and nocturnal hypoglycemia (20.4% vs 5.6%; p <0.0016) |
| L2T3  Swinnen SG, *et al*. 2010 [11] | Patients were randomized for 24 weeks to:   - Gla-100 in the evening - Insulin detemir b.i.d. at breakfast and dinner | **Efficacy:**   - Percentage of patients reaching HbA1c <7% without symptomatic hypoglycemia (PG <3.1 mmol/L)   **Safety:**   - Hypoglycemia - Weight - Insulin doses | Doses increased every 2 days by 2 units until FPG reached <5.6 mmol/L | **Efficacy:**   - 27.5% and 25.6% of patients reached the primary outcome with Gla-100 and insulin detemir, respectively (noninferiority of Gla-100)   **Safety:**   - Hypoglycemic risk similar between both treatment groups - Weight gain higher for Gla-100 with a statistically significant increase of 0.77 kg - Gla-100 doses lower than insulin detemir doses: 43.5 ± 29.0 vs 76.5 ± 50.5 units/day   (p <0.001) |
| EASIE  Aschner P, *et al*. 2012 [12] | Patients were randomized for 24 weeks to:   - Dinner/bedtime Gla-100 plus metformin - Sitagliptin plus metformin | **Efficacy:**   - Change in HbA1c from baseline to study end   **Safety:**   - AEs reported by the patient or noted by the investigator - Symptomatic hypoglycemia | **Starting dose:** 0.2 units/kg  **Titration:** Conducted twice per week using the middle of the past three FPG values  **Target:** 5.5 mmol/L ≥ FPG ≥4.0 mmol/L  **Algorithm:**  **FPG <4.0 mmol/L with or without symptomatic hypoglycemia:** dose decreased by 2 units  **FPG 5.6–7.7 mmol/L:** dose increased by 2 units  **FPG >7.7 mmol/L**: dose increased by 4 units | **Efficacy:**   - Adjusted mean reduction in HbA1c statistically greater (p <0.0001) for patients on Gla-100 (–1.72%) than for those on sitagliptin (–1.13%)   **Safety:**   - Estimated rate of all symptomatic hypoglycemic episodes greater with Gla-100 than with sitagliptin (4.21 vs 0.50 events/patient-year; p <0·0001) - 15 (6%) patients on Gla-100 versus 8 (3%) on sitagliptin had ≥1 serious TEAEs |
| EAGLE  D’Alessio D, *et al*. 2015 [13] | Patients were randomized for 24 weeks to:   - Gla-100 in combination with OADs and a lifestyle program - Liraglutide in combination with OADs and a lifestyle program | **Efficacy:**   - Percentage of subjects reaching HbA1c <7% at study end   **Safety:**   - TEAEs reported by the patient or noted by the investigator - Body weight - Hypoglycemia | **Titration:** Done every 3 days and based on the intermediate FPG value of the past 3 days  **Target:** FPG 4.0–5.5 mmol/L  **Algorithm:**  **FPG ≤3.9 or symptomatic hypoglycemia:** dose decreased by 2 units  **3.9 mmol/L < FPG ≤5.5 mmol/L:** no change in dose  **5.5 mmol/L < FPG ≤7.7 mmol/L:** dose increased by  2 units  **FPG >7.7 mmol/L:** dose increased by 4 units | **Efficacy:**   - Similar numbers of subjects in both groups attained HbA1c level <7% (48.4% vs 45.9%) and superiority of Gla-100 over liraglutide was not observed (p = 0.44) - Subjects treated with Gla-100 had greater reductions of HbA1c (−1.94% vs −1.79%; p = 0.019)   **Safety:**   - The liraglutide group reported a greater number of gastrointestinal TEAEs (p <0.001) - The mean (SD) weight change was +2.0 (4.0) kg for Gla-100, and –3.0 (3.6) kg for liraglutide (p <0.001) - Symptomatic hypoglycemia was more common with Gla-100 (p <0.001) - A greater number of subjects in the liraglutide arm withdrew as a result of AEs (p <0.001) |
| LANCELOT  Home PD, *et al*. 2015 [14] | Patients were randomized for 36 weeks to:   - Evening Gla-100 in combination with OADs - Evening NPH insulin in combination with OADs   The protocol was designed to limit nocturnal hypoglycemia | **Efficacy:**   - Change in HbA1c from baseline to study end   **Safety:**   - Hypoglycemic episodes | **Starting dose:** 0.2 units/kg  **Titration:** Conducted weekly during Weeks 1–4, twice weekly during Weeks 5–12, and then weekly up to Week 36 and based on the median of the last three pre-breakfast glucose measurements  **Target:** Median pre-breakfast and NPG levels ≤5.5 mmol/L  **For FPG *>*7.8 mmol/L:**  NPG ≤4.4 mmol/L or symptomatic hypoglycemia: dose decreased by 2 units  5.5 mmol/L ≥ NPG *>*4.4 mmol/L: no change in dose  7.8 mmol/L ≥ NPG *>*5.5 mmol/L: dose increased by 2 units  NPG *>*7.8 mmol/L: dose increased by 4 units  **For 7.8 mmol/L ≥ FPG *>*5.5 mmol/L:**  NPG ≤4.4 mmol/L or symptomatic hypoglycemia: dose decreased by 2 units  5.5 mmol/L ≥ NPG *>*4.4 mmol/L: no change in dose  7.8 mmol/L ≥ NPG *>*5.5 mmol/L: dose increased by 2 units  NPG *>*7.8 mmol/L: dose increased by 2 units  **For 5.5 mmol/L ≥ FPG *>*4.4 mmol/L:**  NPG ≤4.4 mmol/L or symptomatic hypoglycemia: dose decreased by 2 units  Dose remained the same for the other NPG ranges  **FPG ≤4.4 mmol/L or symptomatic hypoglycemia:** dose decreased by 2 units for all NPG ranges | **Efficacy:**   - HbA1c values and the proportion of participants with HbA1c *<*7.0% were not significantly different for Gla-100 (7.1% and 50.3%) versus NPH (7.2% and 44.3%)   **Safety:**   - The rate of symptomatic nocturnal hypoglycemia, confirmed by PG ≤3.9 or ≤3.1 mmol/L, was 29% and 48% less with Gla-100 than with NPH insulin, respectively   Even when titrating basal insulin to prevent nocturnal hypoglycemia, reduction was achieved in nocturnal hypoglycemia while attaining good glycemic control with Gla-100 compared with NPH |
| GALAPAGOS  Aschner P, *et al*. 2015 [15] | Patients were randomized over 24 weeks to:   - Dinnertime Gla-100 in combination with OADs and in certain patients with insulin glulisine - Dinnertime/breakfast premixed insulin | **Efficacy:**   - Proportion of patients achieving HbA1c <7.0% at the study end with no documented symptomatic hypoglycemia (confirmed by BG ≤3.1 mmol/L)   **Safety:**   - Hypoglycemia | **Starting dose:** 0.2 units/kg  **Titration:** Conducted every 3 days and based on the median of the last three SMBG values  **Target:** SMFBG or premeal BG levels 4.4–5.5 mmol/L  **Titration:**  **FPG <4.4 mmol/L or symptomatic hypoglycemia:** dose decreased by 2 units  **5.5 mmol/L ≥ FPG *>*4.4 mmol/L:** no change in dose  **7.8 mmol/L > FPG *>*5.6 mmol/L:** dose increased by 2 units  **FPG >7.8 mmol/L:** dose increased by 4 units | **Efficacy:**   - HbA1c <7.0% with no documented symptomatic hypoglycemia was achieved by 33.2% of Gla-100 (± insulin glulisine) and 31.4% of premix patients. Superiority was not demonstrated, but noninferiority was (prespecified margin: 25% of premix rate) - More patients using premixed insulin achieved target HbA1c <7% (52.6% vs 43.2%; p = 0.005)   **Safety:**   - Symptomatic hypoglycemia was less with Gla-100 (1.17 vs 2.93 events/patient-year) |

AEs: adverse events; BG: blood glucose; b.i.d.: twice a day; FBG: fasting blood glucose; FPG: fasting plasma glucose; Gla-100: insulin glargine 100 U/mL; HbA1c: glycated hemoglobin; LM, lifestyle management; NPG: nocturnal plasma glucose; NPH: neutral protamine Hagedorn; OAD: oral antidiabetic drug; PG: plasma glucose; PP: per-protocol; SD: standard deviation; SMBG: self-monitoring of blood glucose; SMCBG: self-monitored capillary whole blood glucose; SMFBG: self-monitored FBG; SMFPG: self-monitored FPG; T2DM: type 2 diabetes mellitus; TEAEs: treatment-emergent adverse events; TTT: treat-to-target.

References

1. Fritsche A, Schweitzer MA , Haring HU. Glimepiride combined with morning insulin glargine, bedtime neutral protamine hagedorn insulin, or bedtime insulin glargine in patients with type 2 diabetes: a randomized, controlled trial. Ann Intern Med.2003;138:952–9.

2. Holman RR , Turner RC. A practical guide to basal and prandial insulin therapy. Diabet Med.1985;2:45–53.

3. Riddle MC, Rosenstock J , Gerich J. The treat-to-target trial: randomized addition of glargine or human NPH insulin to oral therapy of type 2 diabetic patients. Diabetes Care.2003;26:3080–6.

4. Janka HU, Plewe G, Riddle MC, et al. Comparison of basal insulin added to oral agents versus twice-daily premixed insulin as initial insulin therapy for type 2 diabetes. Diabetes Care.2005;28:254–9.

5. Eliaschewitz FG, Calvo C, Valbuena H, et al. Therapy in type 2 diabetes: insulin glargine vs. NPH insulin both in combination with glimepiride. Arch Med Res.2006;37:495–501.

6. Rosenstock J, Sugimoto D, Strange P, et al. Triple therapy in type 2 diabetes: insulin glargine or rosiglitazone added to combination therapy of sulfonylurea plus metformin in insulin-naive patients. Diabetes Care.2006;29:554–9.

7. Yki-Jarvinen H, Kauppinen-Makelin R, Tiikkainen M, et al. Insulin glargine or NPH combined with metformin in type 2 diabetes: the LANMET study. Diabetologia.2006;49:442–51.

8. Pan CY, Sinnassamy P, Chung KD, Kim KW. Insulin glargine versus NPH insulin therapy in Asian type 2 diabetes patients. Diabetes Res Clin Pract.2007;76:111–8.

9. Bretzel RG, Nuber U, Landgraf W, et al. Once-daily basal insulin glargine versus thrice-daily prandial insulin lispro in people with type 2 diabetes on oral hypoglycaemic agents (APOLLO): an open randomised controlled trial. Lancet.2008;371:1073–84.

10. Blickle JF, Hancu N, Piletic M, et al. Insulin glargine provides greater improvements in glycaemic control vs. intensifying lifestyle management for people with type 2 diabetes treated with OADs and 7–8% A1c levels. The TULIP study. Diabetes Obes Metab.2009;11:379–86.

11. Swinnen SG, Dain MP, Aronson R, et al. A 24-week, randomized, treat-to-target trial comparing initiation of insulin glargine once-daily with insulin detemir twice-daily in patients with type 2 diabetes inadequately controlled on oral glucose-lowering drugs. Diabetes Care.2010;33:1176–8.

12. Aschner P, Chan J, Owens DR, et al. Insulin glargine versus sitagliptin in insulin-naive patients with type 2 diabetes mellitus uncontrolled on metformin (EASIE): a multicentre, randomised open-label trial. Lancet.2012;379:2262–9.

13. D'Alessio D, Haring HU, Charbonnel B, et al. Comparison of insulin glargine and liraglutide added to oral agents in patients with poorly controlled type 2 diabetes. Diabetes Obes Metab.2015;17:170–8.

14. Home PD, Bolli GB, Mathieu C, et al. Modulation of insulin dose titration using a hypoglycaemia-sensitive algorithm: insulin glargine versus neutral protamine Hagedorn insulin in insulin-naive people with type 2 diabetes. Diabetes Obes Metab.2015;17:15–22.

15. Aschner P, Sethi B, Gomez-Peralta F, et al. Insulin glargine compared with premixed insulin for management of insulin-naive type 2 diabetes patients uncontrolled on oral antidiabetic drugs: the open-label, randomized GALAPAGOS study. J Diabetes Complications.2015;29:838–45.
